# Supplementary material for: Transcriptome analysis of heat resistance regulated by quorum sensing system in Glaesserella parasuis
Source: Front Microbiol. 2022 Aug 11;13:968460. doi: 10.3389/fmicb.2022.968460 (PMC9403865; doi:10.3389/fmicb.2022.968460)
Supplement: Supplementary file 1 [file Table_1.XLSX]

## Sheet: Sheet1
Gene name	readcount_luxS	readcount_GPS2	log2FoldChange	p-vale
pncB	2636.34	434.472	2.601	1.11e-149
glpC	87.834	19.156	2.197	5.16e-14
HAPS_1377	1.315	0.31	2.086	0.59813
HAPS_0636	26.631	6.37	2.064	3.45e-05
HAPS_0219	2800.84	712.945	1.974	2.13e-95
glpA	81.537	21.283	1.938	1.14e-11
glpB	72.162	19.642	1.877	3.77e-10
rcnB	1110.52	325.768	1.769	7.18e-60
HAPS_0962	6.535	1.956	1.74	0.097695
rcnA	702.165	217.314	1.692	6.27e-45
rseA	8268.2	2635.45	1.65	6.39e-82
exo	9.432	3.191	1.564	0.063674
HAPS_1049	535.062	181.413	1.56	1.14e-33
HAPS_2254	4270.84	1600.81	1.416	2.99e-58
pilC	15.924	6.077	1.39	0.024989
HAPS_1551	476.127	184.72	1.366	4.26e-18
aspA	3131.83	1223.3	1.356	2.09e-50
pilB	7.524	2.981	1.336	0.17147
HAPS_1772	3.88	1.545	1.328	0.39104
HAPS_0509	0.977	0.408	1.259	0.77912
fkpA	4017.07	1782.61	1.172	1.14e-41
kefA	5025.49	2241.8	1.165	2.68e-41
HAPS_2245	10.391	4.727	1.136	0.11364
surA	3807.61	1778.23	1.098	6.45e-34
HAPS_1048	50.648	23.728	1.094	0.0004608
HAPS_0718	1976.35	928.823	1.089	1.52e-31
trpR	54.801	25.811	1.086	0.0094019
mtn	674.817	321.181	1.071	2.33e-20
HAPS_1139	66.864	32.363	1.047	0.00013024
HAPS_0184	4994.4	2437.56	1.035	1.9e-33
HAPS_1148	52.578	26.619	0.982	0.0012309
wecC	744.33	378.554	0.975	5.77e-18
HAPS_0667	6409.16	3279.3	0.967	4.29e-30
HAPS_1140	17.823	9.129	0.965	0.17629
mdoB	2365.11	1212.75	0.964	5.74e-26
HAPS_0925	6.793	3.489	0.961	0.26282
pepO	3056.66	1627.79	0.909	1.53e-24
HAPS_0638	54.651	29.473	0.891	0.001994
HAPS_0963	206.43	111.431	0.89	4.5e-08
dsbB	1800.37	972.745	0.888	1.49e-20
tusD	37.29	20.449	0.867	0.014802
rimO	3235.36	1775.82	0.865	2.22e-22
HAPS_1545	45.889	25.463	0.85	0.0060567
scrB	2058.92	1158.12	0.83	2.55e-19
HAPS_2175	461.06	261.888	0.816	2.62e-08
HAPS_1142	127.968	73.248	0.805	0.0039421
malG	1041.37	598.097	0.8	1.38e-09
HAPS_0228	141.645	81.497	0.797	3.08e-05
lsgF	635.544	366.514	0.794	2.46e-12
HAPS_0168	509.582	293.918	0.794	5.3e-11
proQ	1945.02	1127.7	0.786	2.96e-07
murQ	461.323	268.941	0.778	1.03e-06
HAPS_0177	1482.11	867.803	0.772	9.19e-15
ptrA	37217.1	21821.8	0.77	1.67e-16
irp	1199.98	704.399	0.769	2.3e-08
HAPS_0828	2.274	1.336	0.768	0.73006
dsbA	3959.12	2331.49	0.764	9.31e-19
ccp	13908.3	8236.39	0.756	3.92e-20
deoD	3744.3	2219.4	0.755	6.03e-18
mscS	2374.8	1412.42	0.75	9.45e-17
malQ	1740.81	1037.01	0.747	2.95e-11
HAPS_0158	3562.86	2130.67	0.742	3.79e-17
ccmD	16.578	9.973	0.733	0.17829
HAPS_1767	10.422	6.274	0.732	0.31044
nudH	1129.25	684.171	0.723	4.69e-13
HAPS_1980	5.238	3.179	0.72	0.46605
HAPS_0161	26.312	16.116	0.707	0.23757
HAPS_2061	0.663	0.408	0.699	1
HAPS_2044	6.165	3.797	0.699	0.4399
prc	6051.73	3748.56	0.691	5.9e-11
HAPS_2268	2414.94	1498.36	0.689	2.53e-14
HAPS_0977	752.153	467.839	0.685	2.02e-06
HAPS_1197	810.047	505.666	0.68	1.65e-10
rpmF	10.704	6.682	0.68	0.32133
dsbC	2128.34	1328.95	0.679	5.62e-14
HAPS_0483	264.829	166.204	0.672	0.0023076
HAPS_0267	17.861	11.21	0.672	0.26932
lepB	2189.87	1375.27	0.671	3.17e-13
HAPS_0575	2.28	1.435	0.668	0.72748
rlpA	1160.12	733.324	0.662	8.43e-10
HAPS_1223	1459.93	923.251	0.661	5.6e-12
HAPS_2167	87.196	55.269	0.658	0.0038465
lolA	465.99	295.803	0.656	1.77e-05
lsgE	821.929	522.317	0.654	7.7e-06
pckA	31942.4	20341.5	0.651	2.16e-09
HAPS_0921	16.277	10.366	0.651	0.19772
glpF	172.985	110.257	0.65	0.0054975
HAPS_0171	130.315	83.078	0.649	0.0010815
HAPS_0746	3322.96	2133.47	0.639	2.9e-13
aidA	43.621	28.142	0.632	0.044362
rimK	592.486	382.442	0.632	6.31e-08
HAPS_1074	83.176	53.782	0.629	0.0092793
cdtA	4.908	3.18	0.626	0.54136
HAPS_0210	106.295	69.071	0.622	0.0033642
znuA	2051.44	1333.28	0.622	4.51e-10
malK	1446.59	940.607	0.621	1.31e-10
truA	2884.97	1876.09	0.621	2.31e-12
HAPS_0347	28.896	18.813	0.619	0.11388
HAPS_0613	6.475	4.219	0.618	0.6444
nrdD	642.274	420.249	0.612	4.68e-08
yaeL	1424.03	932.277	0.611	1.66e-10
ihfA	898.261	589.693	0.607	9.05e-05
pflB	99825.5	66001.6	0.597	4.89e-14
acpP	10258.3	6784.87	0.596	7.82e-13
HAPS_0708	190.505	126.618	0.589	0.00035014
csrA	635.329	422.455	0.589	0.00029716
HAPS_0917	201.545	134.174	0.587	0.0025626
fdhE	2454.54	1634.5	0.587	1.3e-10
HAPS_0926	3397.26	2265.66	0.584	9.26e-12
pgk	25116.6	16794.3	0.581	7.17e-13
HAPS_0221	4236.93	2838.65	0.578	2.05e-11
aroC	3285.49	2201.46	0.578	4.65e-11
dsrF	88.99	59.739	0.575	0.013822
glpK	270.149	181.896	0.571	7.07e-05
focA	9076.82	6129.07	0.567	1.14e-11
rodA	1015.28	690.16	0.557	3.14e-08
HAPS_1242	424.405	290.055	0.549	7.59e-06
HAPS_0712	134.089	91.932	0.545	0.0052293
yjgP	659.367	452.349	0.544	1.45e-06
ksgA	1124.9	771.847	0.543	3.83e-08
sapF	1664.99	1145.23	0.54	2.32e-08
truC	171.535	118.132	0.538	0.0028554
HAPS_1665	1047.77	723.533	0.534	9.67e-08
HAPS_2256	574.581	397.7	0.531	4.71e-06
yggX	52.85	36.706	0.526	0.17484
HAPS_2195	985.779	687.235	0.52	2.28e-07
rpoZ	870.984	607.496	0.52	5.13e-07
gltX	1638.58	1147.25	0.514	4.24e-08
rpmG	137.752	96.841	0.508	0.091497
murI	821.05	582.466	0.495	2.84e-06
fba	27972.1	19978.2	0.486	1.57e-09
HAPS_1797	1.299	0.929	0.483	1
HAPS_2269	1105.85	791.103	0.483	7.65e-07
accA	4063.83	2910.43	0.482	3.22e-08
anmK	2802.45	2014.78	0.476	1.02e-07
rpmA	2114.18	1524.88	0.471	3.43e-07
tadA	223.456	161.475	0.469	0.0063194
malF	1442.92	1046.08	0.464	7.99e-07
HAPS_0745	609.612	444.192	0.457	6.78e-05
HAPS_2135	1162.09	847.707	0.455	2.71e-06
recO	412.751	301.876	0.451	0.00031669
nrdG	310.318	227.037	0.451	0.00069469
vacJ	1659.84	1220.19	0.444	1.17e-06
bolA	117.044	86.117	0.443	0.033581
tolA	996.335	733.795	0.441	0.0036118
HAPS_0207	160.456	118.271	0.44	0.010495
yheO	655.733	483.427	0.44	5.62e-05
cafA	3528.72	2603.73	0.439	2.99e-07
folK	191.888	141.782	0.437	0.0088219
HAPS_2035	74.734	55.343	0.433	0.093596
nikC	210.525	156.193	0.431	0.0079081
grcA	17282.5	12859.4	0.427	1.84e-07
rusA	268.986	200.41	0.425	0.0029003
perM	2179.06	1625.46	0.423	2.16e-06
radC	2.614	1.954	0.42	0.8992
nrfG	186.766	140.105	0.415	0.011673
spoT	5979.13	4488.73	0.414	7.97e-07
rbsC	291.391	218.789	0.413	0.00286
era	1755.6	1318.51	0.413	7.39e-06
HAPS_2246	30.519	23.001	0.408	0.23924
yecO	1527.27	1152.73	0.406	1.35e-05
rfbB	4370.65	3299.48	0.406	0.015979
tolQ	986.639	747.033	0.401	7.16e-05
HAPS_0398	5687.79	4310	0.4	0.0041241
rpmE2	165.954	126.005	0.397	0.019676
HAPS_1596	342.104	259.865	0.397	0.020657
trkG	1049.3	797.165	0.396	6.62e-05
nlpE	1262.81	959.656	0.396	3.11e-05
HAPS_1914	2667.63	2027.59	0.396	9.8e-06
nrdR	1297.08	986.147	0.395	4.83e-05
malE	6457.51	4911.13	0.395	5.33e-05
smpA	1859.72	1416.78	0.392	2.09e-05
yejF	862.354	657.247	0.392	0.00017759
capD	44.595	34.011	0.391	0.20416
HAPS_1771	835.066	638.121	0.388	0.00028646
ruvC	420.255	321.653	0.386	0.0016485
oppCD	4326.62	3320.77	0.382	5.56e-06
coaD	1506.91	1156.78	0.381	3.64e-05
dcuB	5122.77	3936.72	0.38	7.33e-06
HAPS_0533	143.36	110.181	0.38	0.059881
lepA	4255.8	3273.23	0.379	1.19e-05
ompD15	13693.1	10566.5	0.374	0.030074
pulG	9.411	7.288	0.369	0.57231
HAPS_1052	69.203	53.619	0.368	0.12405
sanA	321.491	249.191	0.368	0.0055187
HAPS_0744	842.556	653.477	0.367	0.00036099
ycbX	199.784	155.714	0.36	0.023663
rumB	698.363	544.362	0.359	0.00082682
HAPS_1176	106.702	83.222	0.359	0.072804
ppc	12853.5	10040.6	0.356	1.56e-05
rpsU	4584.52	3582.06	0.356	3.71e-05
cof	2053.74	1607.91	0.353	0.0014956
arcB	3149.23	2466.12	0.353	0.0060586
xthA	362.507	283.904	0.353	0.0054207
ptsH	5306.22	4158.69	0.352	0.00093608
yacG	644.778	505.892	0.35	0.0016681
ackA	10022.1	7875.45	0.348	2.28e-05
rnfD	292.749	230.318	0.346	0.015345
hemA	2684.82	2113.08	0.345	7.91e-05
oppF	3595.71	2830.61	0.345	7.61e-05
ptsN	500.88	394.449	0.345	0.074175
HAPS_2053	54.973	43.344	0.343	0.18908
HAPS_1184	3.256	2.574	0.339	0.91925
carA	926.891	732.796	0.339	0.00066063
deoC	2352.79	1865.76	0.335	0.00012819
HAPS_1496	893.841	708.994	0.334	0.00085757
wecG	279.602	221.781	0.334	0.016502
sprT	251.264	199.432	0.333	0.025542
artP	1305.94	1036.63	0.333	0.0066388
purN	396.352	314.621	0.333	0.0061551
HAPS_0458	331.454	263.151	0.333	0.050753
omp26	5241.42	4161.5	0.333	0.17923
fumC	14882	11828.6	0.331	0.0020265
comEA	139.514	110.996	0.33	0.11576
fucK	106.29	84.724	0.327	0.12156
iscU	5570.66	4442.9	0.326	0.00012961
yfeD	256.789	204.809	0.326	0.02987
pfkA	4941.34	3943.26	0.326	0.00013817
HAPS_1002	209.46	167.191	0.325	0.034193
rpmH	30.545	24.388	0.325	0.46109
fis	396.723	317.051	0.323	0.010175
dacA	4078.26	3260.41	0.323	0.00011477
mltC	4045.75	3238.75	0.321	0.00015324
HAPS_2194	3028.65	2425.68	0.32	0.11479
HAPS_0493	85.846	68.831	0.319	0.14043
ptsEIIB	159.363	127.78	0.319	0.07106
ecoRIM	471.956	378.574	0.318	0.0057627
recD	948.376	761.19	0.317	0.012463
HAPS_1164	1353.14	1089.23	0.313	0.0013705
HAPS_0157	852.013	686.336	0.312	0.025081
crr	6195.59	4992.82	0.311	0.00025793
dnaX	2892.62	2331.5	0.311	0.00030796
trxB	7714.89	6239.64	0.306	0.00026436
HAPS_0694	1311.74	1062.34	0.304	0.0011964
slyD	2550.28	2065.68	0.304	0.00063033
artQ	2178.05	1765.3	0.303	0.0059149
ihfB	1201.73	974.395	0.303	0.088886
HAPS_0931	1166.42	945.941	0.302	0.0017787
deaD	2890.47	2344.52	0.302	0.00067727
rpsT	3912.83	3178.67	0.3	0.0004167
rho	4339.25	3528.9	0.298	0.00026947
cysK	66455.1	54047.6	0.298	0.00028343
HAPS_0932	735.101	597.887	0.298	0.0054174
engB	1134.15	923.545	0.296	0.0024858
pssA	2699.49	2198.68	0.296	0.00063698
rbsA	405.878	331.157	0.294	0.014971
int	834.851	681.355	0.293	0.0033961
glpR	744.654	608.272	0.292	0.0054775
HAPS_0648	2431.16	1987.01	0.291	0.0010105
dcd	1910.22	1562.48	0.29	0.0012293
HAPS_1390	174.376	142.739	0.289	0.074217
manB	24437.9	20018.5	0.288	0.0012914
HAPS_0684	299.168	245.158	0.287	0.10884
artM	3078.3	2523.38	0.287	0.0010971
hxuA	179.528	147.228	0.286	0.24935
dipZ	2082.12	1707.72	0.286	0.031892
hnh	473.865	388.695	0.286	0.11481
queA	857.842	704.08	0.285	0.0041987
aroA	1939.41	1591.83	0.285	0.15782
gapA	62616.5	51413.2	0.284	0.00034525
rpmB	3431.76	2821.5	0.282	0.00089817
cdd	906.656	745.728	0.282	0.0039755
HAPS_1449	16.605	13.687	0.279	0.67102
dnaB	3196.28	2635.7	0.278	0.0010679
HAPS_1166	307.146	253.511	0.277	0.037399
HAPS_0021	701.845	579.392	0.277	0.01219
ubiF	412.249	340.683	0.275	0.13316
rseC	142.673	117.964	0.274	0.15736
HAPS_0405	462.13	382.357	0.273	0.1144
murA	4345.07	3596.21	0.273	0.0014677
pcnB	1523.97	1261.66	0.273	0.0029667
vacB	3160.24	2617.65	0.272	0.0013425
nikA	1299.3	1077.75	0.27	0.0036529
ftsK	1822.7	1511.96	0.27	0.012776
rluB	2609.1	2164.96	0.269	0.002558
yfeA	9025.73	7492.35	0.269	0.0014717
HAPS_0484	1806.17	1499.43	0.269	0.063086
HAPS_0209	1580.17	1312.78	0.267	0.0041528
HAPS_1138	152.118	126.461	0.266	0.10543
HAPS_0370	29.399	24.445	0.266	0.60804
HAPS_1190	6.798	5.655	0.266	0.80724
ndh	3049.55	2536.71	0.266	0.0018302
cmk	910.789	758.779	0.263	0.037946
argR	721.654	601.291	0.263	0.011279
gyrB	5272.11	4394.64	0.263	0.0015765
HAPS_0382	43.849	36.558	0.262	0.35267
rpsP	304.234	253.777	0.262	0.058781
HAPS_2136	1205.2	1006.54	0.26	0.0055653
bgaC	588.731	492.458	0.258	0.1101
rpiR	810.377	678.284	0.257	0.011241
pepQ	2711.06	2269.88	0.256	0.0032113
ipk	152.928	128.307	0.253	0.16309
HAPS_1143	3442.76	2888.66	0.253	0.0024981
HAPS_2230	44.603	37.439	0.253	0.45709
sufI	1948.17	1635.33	0.253	0.010231
HAPS_0973	273.086	229.258	0.252	0.065279
HAPS_2225	8049.06	6759.38	0.252	0.023896
azoR	845.137	709.767	0.252	0.013015
hemC	2384.8	2003.02	0.252	0.043674
kdkA	1285.88	1080.15	0.252	0.0070602
HAPS_1025	16.266	13.674	0.25	0.66469
mdh	4960.32	4171.5	0.25	0.0026967
fadI	269.203	226.422	0.25	0.077963
mtgA	169.618	142.757	0.249	0.1322
lpxD	1672.01	1408.7	0.247	0.11999
HAPS_0412	35.086	29.568	0.247	0.41848
HAPS_1468	1404	1183.94	0.246	0.011043
HAPS_0979	888.03	749.591	0.245	0.019478
greB	589.26	497.41	0.244	0.023722
frdC	53.416	45.096	0.244	0.36496
lgt	1305.79	1103.2	0.243	0.030745
ubiA	709.105	600.027	0.241	0.029611
rpoD	2766.21	2341.65	0.24	0.0057152
tktA	29335.2	24835.9	0.24	0.0025006
HAPS_0079	600.824	509.128	0.239	0.031141
HAPS_1448	226.193	191.706	0.239	0.098603
HAPS_1897	15.264	12.942	0.238	0.64722
HAPS_0147	142.664	121.097	0.236	0.14931
HAPS_0788	784.253	666.89	0.234	0.029648
nrfC	1173.35	997.758	0.234	0.018846
menB	1895.83	1612.7	0.233	0.010973
nrfA	4465.93	3802.97	0.232	0.0065116
mltB	195.148	166.289	0.231	0.2016
sufE	663.909	565.997	0.23	0.034927
prsA	1753.34	1496.29	0.229	0.018961
hmuV	118.757	101.464	0.227	0.25697
asd	1696.28	1449.29	0.227	0.013303
HAPS_0249	20.199	17.287	0.225	0.72052
glgC	2660.85	2277.29	0.225	0.011699
HAPS_0085	1943.76	1665.39	0.223	0.071494
eno	36950.4	31672.3	0.222	0.006048
kpsF	1011.5	867.029	0.222	0.022989
fdxI	1147.71	985.519	0.22	0.030453
mviN	283.996	244.18	0.218	0.11598
dusB	2525.64	2173	0.217	0.01339
ptsI	7401.61	6371.2	0.216	0.00694
kdtA	1854.86	1597.71	0.215	0.019546
HAPS_1717	1268.78	1093.35	0.215	0.019868
lolE	527.578	454.99	0.214	0.077015
dksA	1459.3	1258.6	0.213	0.019579
pyrAB	7117.31	6139.85	0.213	0.009617
mfd	2820.85	2433.67	0.213	0.029127
hemN	4542.22	3919.9	0.213	0.010046
hcaT	1116.58	964.174	0.212	0.031244
hfq	6466.83	5584.45	0.212	0.01133
rsbV	250.246	216.133	0.211	0.23097
tatA	574.772	496.596	0.211	0.19821
ribF	2845.8	2462.09	0.209	0.014615
yniC	419.669	363.307	0.208	0.076186
glpX	1357.13	1174.87	0.208	0.027804
tgt	2323.65	2011.65	0.208	0.023082
zapA	855.298	740.723	0.207	0.04811
scrR	2640.71	2287.78	0.207	0.015776
HAPS_1233	12.941	11.214	0.207	0.7817
infA	2106.12	1825.81	0.206	0.023741
phnA	496.32	430.43	0.205	0.084402
ushA	28616	24835.8	0.204	0.2539
aspC	2392.87	2076.83	0.204	0.02323
HAPS_0855	2.607	2.263	0.204	1
dnaG	885.03	768.38	0.204	0.044294
rlmB	423.505	368.044	0.203	0.11595
ruvB	3055.96	2655.91	0.202	0.023431
ribE	17.861	15.53	0.202	0.73999
HAPS_1904	402.609	350.226	0.201	0.14345
HAPS_0315	188.662	164.195	0.2	0.23938
tpiA	10202.3	8895.05	0.198	0.014986
nikB	252.315	219.987	0.198	0.26999
HAPS_2264	13.631	11.912	0.195	0.73127
rnc	651.378	569.421	0.194	0.088076
hflX	2175.23	1902	0.194	0.022475
yciI	593.835	519.793	0.192	0.081526
HAPS_0066	1804.58	1579.62	0.192	0.057114
cysE	374.88	328.202	0.192	0.17065
HAPS_2100	10449	9150.06	0.192	0.44902
rplO	4905.74	4296.17	0.191	0.11761
rpsM	3021.36	2647.42	0.191	0.030008
iolB	383.288	336.166	0.189	0.11009
lapB	900.053	789.973	0.188	0.048358
HAPS_2096	27394.3	24060.4	0.187	0.018687
HAPS_2267	3354.68	2947.47	0.187	0.14014
srmB	1053.32	925.858	0.186	0.067762
sua5	3591.15	3159.11	0.185	0.032921
ubiG	1053.82	927.513	0.184	0.11742
modE	439.946	387.795	0.182	0.10176
rpsI	7334.64	6466.85	0.182	0.038813
HAPS_0588	655.252	578.142	0.181	0.14623
fucI	249.687	220.379	0.18	0.33173
glyQ	2061.26	1819.75	0.18	0.067585
HAPS_1677	390.93	345.355	0.179	0.13428
ptsEIID	780.846	689.833	0.179	0.093298
hktE	10467.8	9263.65	0.176	0.034953
ompP2	77555.6	68712.1	0.175	0.24872
HAPS_1537	57.539	50.984	0.175	0.52968
parE	3576.06	3169.93	0.174	0.029069
smtA	1285.61	1139.81	0.174	0.26426
ispB	1060.01	940.029	0.173	0.072293
tdk	1446.91	1283.62	0.173	0.055098
nrfD	3010.23	2672.39	0.172	0.049814
alsT	77.613	68.908	0.172	0.52025
coaE	984.639	874.443	0.171	0.092543
oppB	3060.82	2718.67	0.171	0.041503
atpD	9477.46	8418.47	0.171	0.055777
pflA	3273.6	2908.23	0.171	0.05107
rplQ	4105.22	3651.11	0.169	0.1013
HAPS_2236	2568.74	2285.84	0.168	0.36419
lacD	457.747	407.819	0.167	0.16618
rplV	1952.94	1740.5	0.166	0.53707
ftsJ	1976.37	1761.65	0.166	0.36139
moeA	989.278	882.23	0.165	0.1092
HAPS_1903	505.287	450.69	0.165	0.18139
smf	744.107	663.786	0.165	0.12253
HAPS_1415	213.849	190.774	0.165	0.51362
yidC	4341.08	3873.28	0.165	0.041044
recB	1644.53	1467.96	0.164	0.085932
HAPS_1416	834.161	744.816	0.163	0.37549
leuD	160.976	143.805	0.163	0.36503
rplU	4248.88	3796.34	0.162	0.054094
folD	2216.13	1981.1	0.162	0.063728
potC	3632.65	3250.55	0.16	0.069974
hbpA	123319	110412	0.16	0.040922
uhpB	202.517	181.35	0.159	0.32085
ampD	288.819	258.632	0.159	0.26487
yfeC	268.9	241.005	0.158	0.257
ribD	108.659	97.506	0.156	0.41121
rluC	1209.73	1085.68	0.156	0.11432
tolB	1551.95	1394.04	0.155	0.11642
HAPS_1243	456.516	410.329	0.154	0.21156
HAPS_0587	11.104	9.99	0.152	0.95309
glyS	2551.96	2296.15	0.152	0.22035
celB	97.107	87.375	0.152	0.48718
mrcA	2597.38	2337.74	0.152	0.090722
ffh	2081.8	1873.76	0.152	0.27378
trpH	488.565	439.809	0.152	0.22992
HAPS_1014	2006.69	1806.49	0.152	0.2263
HAPS_0084	754.306	679.23	0.151	0.13557
oppA	22709.8	20460.6	0.15	0.058287
rbsR	501.114	451.892	0.149	0.1614
HAPS_0742	1977.06	1783.49	0.149	0.16682
HAPS_0218	666.09	601.02	0.148	0.39826
yckJ	5023.68	4533.78	0.148	0.071483
atpC	2254.08	2034.68	0.148	0.076437
glgA	2638	2381.41	0.148	0.09183
HAPS_1808	755.546	682.233	0.147	0.14231
afuA	19733.1	17835.4	0.146	0.072864
tolC	4769.85	4313.33	0.145	0.076314
HAPS_0974	375.365	339.717	0.144	0.2417
HAPS_0758	91.587	82.904	0.144	0.47791
rpsD	5699.68	5161.79	0.143	0.17327
HAPS_1660	928.024	841.055	0.142	0.16563
HAPS_0743	933.287	845.84	0.142	0.15339
udk	2824.28	2562.14	0.141	0.12397
HAPS_1183	215.586	195.672	0.14	0.43442
visC	3301.82	2997.27	0.14	0.15993
fdxH	2114.1	1920.9	0.138	0.13018
HAPS_0945	679.88	618.405	0.137	0.43312
cdtC	159.104	144.72	0.137	0.43657
rplE	4684.57	4263.02	0.136	0.34764
acpD	1586.6	1443.84	0.136	0.15257
proC	1945.04	1771.45	0.135	0.14175
hsdR	3789.14	3451.64	0.135	0.098507
dnaN	3458.57	3151.52	0.134	0.11444
dsbE	433.567	395.355	0.133	0.26251
fucU	24.331	22.187	0.133	0.72168
comFC	72.404	66.046	0.133	0.65029
yigQ	509.646	465.271	0.131	0.23092
glgB	7354.58	6716.1	0.131	0.1195
xerC	1531.3	1399.1	0.13	0.14922
argH	3026.72	2765.86	0.13	0.12854
sfsA	1796.25	1641.5	0.13	0.19976
yadS	201.473	184.241	0.129	0.37871
rpmC	79.282	72.502	0.129	0.50688
HAPS_0665	3.26	2.981	0.129	1
sodC	397.85	364.24	0.127	0.34053
iolG	362.019	331.467	0.127	0.33018
HAPS_0748	117.622	107.766	0.126	0.47716
hlpB	709.426	650.002	0.126	0.53447
HAPS_2205	335.447	307.401	0.126	0.29775
cysS	5731.22	5252.71	0.126	0.14026
ybgC	149.721	137.288	0.125	0.54828
phd	35.518	32.589	0.124	0.77841
rpoH	2410.94	2212.67	0.124	0.21183
HAPS_0662	845.345	775.991	0.124	0.22202
rpmI	1053.55	967.654	0.123	0.27582
tyrS	992.384	911.636	0.122	0.21294
ccmF	1914.3	1758.56	0.122	0.29682
hsdM	2959.71	2719.3	0.122	0.18757
ftsH	6061.48	5570.71	0.122	0.12674
potA	8857.64	8140.53	0.122	0.14407
HAPS_1830	54.2	49.822	0.122	0.63266
HAPS_0486	257.074	236.308	0.122	0.3483
dnaA	3488.97	3207.43	0.121	0.14943
HAPS_1801	192.303	176.791	0.121	0.46456
fdhD	793.147	729.279	0.121	0.23929
serS	4653.65	4279.55	0.121	0.13717
prfC	1491.67	1372.2	0.12	0.28036
ilvA	1476.38	1358.41	0.12	0.35712
lysA	1499.12	1379.34	0.12	0.18069
mreB	3581.57	3295.68	0.12	0.17321
modC	1054.66	970.489	0.12	0.33936
zapB	464.24	427.515	0.119	0.32045
mioC	2159.84	1989.03	0.119	0.18921
glnS	5847.1	5384.74	0.119	0.12376
HAPS_1024	553.781	510.149	0.118	0.48323
galU	3458.88	3186.53	0.118	0.16322
HAPS_1785	323.607	298.161	0.118	0.37692
rpsA	33479.9	30856.3	0.118	0.54999
msrB	1314.29	1212.18	0.117	0.26509
ccmB	221.862	204.695	0.116	0.48869
HAPS_0440	261.246	241.075	0.116	0.44703
hemY	3835.8	3542.06	0.115	0.36443
rnfB	211.485	195.325	0.115	0.48349
rnfG	216.818	200.334	0.114	0.46671
pilF	184.549	170.573	0.114	0.39093
lolB	460.627	426.196	0.112	0.37543
HAPS_1503	1103.9	1021.75	0.112	0.25879
ostA	5279.73	4890.2	0.111	0.15721
rplF	5855.59	5426.21	0.11	0.39753
hemD	1002.08	928.735	0.11	0.25668
dapA	6690.13	6202.6	0.109	0.19036
HAPS_0083	1005.39	932.361	0.109	0.51713
mutY	861.357	799.037	0.108	0.35136
sgbK	315.994	293.14	0.108	0.39137
ispA	1120.89	1039.84	0.108	0.31012
hemH	581.059	539.216	0.108	0.32486
hmuU	130.321	120.959	0.108	0.55381
sohB	2070.38	1922.08	0.107	0.21025
glnE	797.716	741.036	0.106	0.30433
ileS	13285	12341.6	0.106	0.20215
atpG	1464.53	1361.06	0.106	0.49513
rpoB	10526.4	9783.01	0.106	0.16164
sirA	795.355	739.203	0.106	0.31739
recJ	1538.19	1429.93	0.105	0.28894
fadJ	324.394	301.766	0.104	0.39252
rnfC	1504.62	1399.89	0.104	0.29166
obgE	860.578	800.747	0.104	0.34287
folP	1019.06	948.321	0.104	0.27479
ansB	533.742	497.024	0.103	0.39847
apaH	683.627	637.259	0.101	0.38772
glnB	104.339	97.281	0.101	0.71309
nhaP	269.328	251.242	0.1	0.51667
omp18%2F16	799.372	745.833	0.1	0.64525
HAPS_1523	1096.52	1023.25	0.1	0.64182
metC	766.051	714.906	0.1	0.3736
atpA	9467.2	8836.75	0.099	0.34764
HAPS_1257	245.233	228.963	0.099	0.55401
asnC	4707.45	4399.8	0.098	0.23289
trmU	949.895	888.184	0.097	0.44251
engC	1468.2	1373.42	0.096	0.28457
lppA	3355.76	3139.97	0.096	0.47859
HAPS_1220	8986.83	8412.71	0.095	0.25671
lipB	352.562	330.14	0.095	0.42689
stbD	160.512	150.335	0.095	0.47596
iscX	129.394	121.225	0.094	0.715
rplR	1263.91	1184.55	0.094	0.54318
infB	6078.32	5698.86	0.093	0.59004
glo1	259.952	243.852	0.092	0.50562
sdhA	1936.64	1817.13	0.092	0.54989
tyrR	2652.01	2488.45	0.092	0.28168
HAPS_1040	849.618	797.241	0.092	0.3745
cydA	12847	12056.4	0.092	0.2613
HAPS_1060	296.767	278.537	0.091	0.50882
bcgIB	537.158	504.224	0.091	0.3689
HAPS_0750	626.754	588.34	0.091	0.34811
aslB	645.013	605.981	0.09	0.39142
psd	1114.24	1047.22	0.089	0.35052
rnpA	234.055	220.067	0.089	0.56748
nrfB	1609.59	1513.62	0.089	0.29783
rpsR	171.947	161.702	0.089	0.62607
yckI	5207.83	4899.54	0.088	0.25754
rnfA	347.552	327.084	0.088	0.53467
HAPS_1576	165.095	155.383	0.087	0.59236
HAPS_0702	32.758	30.831	0.087	0.83233
sixA	294.583	277.405	0.087	0.4881
rnhA	2390.71	2252.22	0.086	0.34714
ubiE	1181.96	1113.56	0.086	0.4087
lcfA	2330.69	2196.5	0.086	0.31796
pyrE	1211.25	1141.74	0.085	0.3782
HAPS_1172	495.33	467.874	0.082	0.50327
csgG	612.196	578.457	0.082	0.76457
HAPS_2244	3.914	3.698	0.082	1
HAPS_0087	2237.59	2115.32	0.081	0.52861
brnQ	2823.57	2669.94	0.081	0.30914
fur	2280.78	2157.85	0.08	0.32947
sapA	656.374	621.186	0.079	0.50068
rpsC	8864.48	8392.59	0.079	0.67198
gpmA	31067.8	29438.7	0.078	0.34448
HAPS_0140	1000.83	948.479	0.078	0.45535
HAPS_1659	923.892	875.6	0.077	0.42252
aroK	770.857	730.742	0.077	0.45637
mesJ	820.695	777.998	0.077	0.4609
dtd	171.48	162.601	0.077	0.70608
priA	1488.11	1411.41	0.076	0.47522
prfA	1256.93	1192.67	0.076	0.41963
dapE	1071.45	1016.75	0.076	0.47002
leuS	5336.6	5064.46	0.076	0.42942
arsC	484.182	459.626	0.075	0.49437
mukF	1763.02	1674.28	0.075	0.42707
nanK	599.605	569.435	0.074	0.58988
ampG	1100.75	1045.54	0.074	0.45394
surE	476.026	452.169	0.074	0.77674
hupA	18116.1	17221.8	0.073	0.40923
argS	1832.02	1741.71	0.073	0.41466
HAPS_0098	89.428	85.058	0.072	0.87566
trkA	1064.73	1012.71	0.072	0.48971
ptsEIIC	769.885	732.295	0.072	0.52003
HAPS_2041	172.439	164.14	0.071	0.67957
lysE	225.766	215.011	0.07	0.73618
rpoC	3924.34	3738.19	0.07	0.38692
rplN	8593.24	8189.49	0.069	0.36748
HAPS_1504	116.831	111.345	0.069	0.78891
oppD	1105.92	1054.17	0.069	0.4747
marC	1985.49	1893.47	0.068	0.46982
ybfE	672.977	641.89	0.068	0.55882
HAPS_0689	4041.21	3855.55	0.068	0.43511
atpI	1531.96	1461.86	0.068	0.50179
trpA	366.818	350.075	0.067	0.61205
mpl	1554.88	1484.26	0.067	0.45728
HAPS_0957	3515.44	3356.95	0.067	0.38131
hepA	3020.1	2883.99	0.067	0.48734
nagZ	839.983	802.211	0.066	0.70918
rne	7817.52	7472.33	0.065	0.48857
rpsG	4366.84	4174.04	0.065	0.44276
ppnK	1583.26	1513.6	0.065	0.50356
HAPS_1708	375.18	358.778	0.064	0.62417
kdsA	1819.21	1739.87	0.064	0.44345
pepD	3642.59	3485.75	0.063	0.43181
suhB	2489.48	2382.36	0.063	0.49794
kefB	3257.61	3117.63	0.063	0.5097
rpsO	4912.4	4702.86	0.063	0.48203
palA	17864.8	17104.7	0.063	0.52252
yfgE	828.79	793.565	0.063	0.5538
HAPS_1478	607.601	581.815	0.063	0.53546
HAPS_0969	1106.4	1059.6	0.062	0.51071
ldhA	3343.57	3202.41	0.062	0.47677
HAPS_2064	0.323	0.309	0.062	1
menF	1147.25	1099.39	0.061	0.58374
hscA	2727.4	2614.28	0.061	0.52867
artI	4301.11	4123.7	0.061	0.55537
efp	4159.51	3988.36	0.061	0.50119
msbA	7754.28	7437.11	0.06	0.46429
HAPS_1962	1047.8	1005.74	0.059	0.5319
hflK	1658.81	1592.25	0.059	0.66392
rplX	3653.56	3507.4	0.059	0.49769
metG	3212.54	3084.69	0.059	0.47737
HAPS_0982	2755.71	2646.07	0.059	0.43042
nusA	3188.01	3061.55	0.058	0.64721
lpxC	10950.7	10521.4	0.058	0.45671
dps	4407.43	4234.99	0.058	0.52274
glmM	1343.88	1291.4	0.057	0.56016
yojA	1704.06	1637.76	0.057	0.53722
HAPS_1998	1542.35	1483.44	0.056	0.52406
HAPS_2145	909.684	875.037	0.056	0.5931
nqrD	5558.62	5347.59	0.056	0.4511
fabD	2506.64	2412.03	0.056	0.56658
dusA	1741.5	1676.03	0.055	0.56217
ftsZ	7087.34	6822.06	0.055	0.6167
recX	374.583	360.614	0.055	0.65568
fdxG_1	8344.7	8042.71	0.053	0.51335
bioY	2989.71	2881.87	0.053	0.52881
sapD	496.884	479.515	0.051	0.65759
truB	287.865	277.803	0.051	0.8341
rimM	3425.97	3307.28	0.051	0.55661
recR	516.582	498.89	0.05	0.71248
HAPS_0248	27.961	27.005	0.05	0.87629
nqrF	13920.6	13445.5	0.05	0.52506
ccmH_1	189.293	182.962	0.049	0.69375
aspS	3871.53	3744.39	0.048	0.61088
oppC	638.68	617.959	0.048	0.66645
fabI	3045.99	2947.48	0.047	0.57673
rpsL	7976.69	7725.18	0.046	0.56907
trmA2	580.264	562.105	0.046	0.7701
rplW	1329.27	1287.82	0.046	0.78412
arg	1066.39	1033.73	0.045	0.67335
pnp	6399.72	6210.33	0.043	0.54957
proS	2207.6	2145.24	0.041	0.70827
rbsK	3211.23	3120.78	0.041	0.67525
hemK	799.971	777.806	0.041	0.71927
yibK	647.936	630.146	0.04	0.82877
HAPS_2204	488.089	474.779	0.04	0.69217
uhpT	555.64	540.533	0.04	0.7211
HAPS_0069	203.347	197.822	0.04	0.92751
rplM	14751.2	14351.3	0.04	0.63351
HAPS_0139	1516.88	1475.78	0.04	0.68492
ubiX	658.696	640.925	0.039	0.80988
HAPS_1654	285.076	277.475	0.039	0.86771
HAPS_2121	1235.12	1202.68	0.038	0.69674
lpxM	639.253	623.248	0.037	0.83276
zipA	2014.63	1964.88	0.036	0.6009
secY	24794.6	24217.9	0.034	0.61299
HAPS_1292	13013.5	12714.2	0.034	0.6899
nrdB	8108.53	7922.76	0.033	0.63044
adpP	555.509	542.824	0.033	0.73963
ydhD	2472.88	2416.5	0.033	0.7843
HAPS_2147	36.666	35.833	0.033	0.91602
trpB	576.843	563.832	0.033	0.84536
rpsN	1579.69	1544.58	0.032	0.71624
ppa	4397.64	4300.2	0.032	0.70468
HAPS_2197	496.059	485.258	0.032	0.87838
HAPS_1524	174.6	170.843	0.031	0.88296
dut	28.338	27.732	0.031	0.91849
nth	697.398	682.658	0.031	0.7548
ptsEIIA	183.935	180.133	0.03	0.93742
dat	434.252	425.435	0.03	0.79308
apt	1751.09	1716	0.029	0.78781
dam	218.24	213.923	0.029	0.8902
holA	856.196	839.512	0.028	0.79482
frdD	4283.06	4201.98	0.028	0.76081
acrB	14030.9	13765.4	0.028	0.77283
HAPS_0711	7576.34	7433.66	0.027	0.67457
ptp	752.642	738.854	0.027	0.83577
fieF	165.379	162.356	0.027	0.84501
proB	856.231	840.656	0.026	0.89153
vimF	55.909	54.904	0.026	0.99725
xerD	1313.59	1290.07	0.026	0.76401
HAPS_0806	1178.39	1157.41	0.026	0.82215
hipA	1039.61	1021.14	0.026	0.79201
HAPS_1163	306.349	300.973	0.026	0.89533
aroE	1514.19	1488.6	0.025	0.7862
glgX	2295.78	2258.27	0.024	0.79419
pykA	5980.3	5883.12	0.024	0.77972
rplL	6994.06	6884.58	0.023	0.8298
torD	111.285	109.546	0.023	0.90209
mrp	2626.74	2586.35	0.022	0.85485
dxs	4327.12	4263.46	0.021	0.92213
HAPS_0675	1211.04	1194.32	0.02	0.7169
polA	2713.96	2677.03	0.02	0.86101
pta	8766.62	8651.15	0.019	0.79443
HAPS_1237	116.236	114.738	0.019	0.87601
lpxB	343.295	338.993	0.018	0.96926
folC	1551.5	1532.31	0.018	0.8172
nagK	1073.77	1061.02	0.017	0.87378
cyaY	403.166	398.66	0.016	0.91584
rpmD	24.6	24.333	0.016	0.95104
corB	1881.75	1861.97	0.015	0.81286
potB	3920.85	3880.04	0.015	0.87376
rplP	3064.86	3033.34	0.015	0.88641
pabB	198.915	196.879	0.015	0.89739
kdsB	584.104	578.209	0.015	0.92469
bcgIA	997.212	987.588	0.014	0.89863
HAPS_2067	546.802	541.55	0.014	0.93398
mtr	1103.09	1093.02	0.013	0.86196
rpsQ	371.725	368.378	0.013	0.93441
topA	5707.55	5656.21	0.013	0.85378
accB	518.231	513.61	0.013	0.95765
HAPS_1256	170.137	168.642	0.013	0.95553
dnaE	4094.15	4059.44	0.012	0.99541
ftsA	3342.75	3315.02	0.012	0.81619
gph	1617.71	1604.88	0.011	0.85688
mukB	7050.78	6995.73	0.011	0.86946
HAPS_2226	65.669	65.179	0.011	1
HAPS_1382	2032.04	2017.62	0.01	0.99932
upp	1746.67	1734.45	0.01	0.87017
purK	284.652	282.783	0.01	0.92799
HAPS_0472	507.432	504.134	0.009	0.99733
trpD	60.709	60.337	0.009	1
moeB	1531.74	1522.49	0.009	0.95213
HAPS_0332	748.083	743.692	0.008	0.84182
HAPS_0502	1484.66	1476.01	0.008	0.87681
gpsA	672.855	669.257	0.008	0.9744
recC	1026.16	1020.95	0.007	0.91518
infC	4890.16	4865.48	0.007	0.94316
sgbE	2168.89	2158.45	0.007	0.96715
HAPS_0022	401.943	400.22	0.006	0.9795
rpoA	17491.7	17416.8	0.006	0.91784
plsB	4736.12	4716.15	0.006	0.91924
secG	3060.92	3048.68	0.006	0.99748
HAPS_1464	81.346	81.029	0.006	0.98892
terC	369.953	368.833	0.004	0.96505
HAPS_2239	426.385	425.114	0.004	0.9999
ppx	3927.14	3915.91	0.004	0.90126
serC	1806.83	1801.83	0.004	0.96568
pepN	4643.53	4633.49	0.003	0.97513
hemL	2988.26	2982.15	0.003	0.97508
murD	369.637	369.007	0.002	0.99082
ndk	933.533	931.963	0.002	0.98937
gmhB	944.654	943.099	0.002	0.91738
alaT	4681.85	4674.81	0.002	0.99303
nifS	582.371	581.53	0.002	0.94817
rnd	780.067	779.496	0.001	0.97914
bioD	5818.78	5814.93	0.001	0.98128
fldA	1432.94	1432.08	0.001	0.97389
fbpC	1838.53	1838.36	0	0.97641
talB	9453.1	9460.15	-0.001	0.96539
nqrC	6415.52	6420.95	-0.001	0.9476
leuA	1152.38	1153.89	-0.002	0.9807
rpsH	4061.29	4067.34	-0.002	0.97414
mepA	504.219	505.128	-0.003	0.90266
wzs	10214.5	10233.6	-0.003	0.9553
uraA	1449.21	1452.1	-0.003	0.91374
uvrC	702.595	704.211	-0.003	0.96298
yccA	2206.47	2211.65	-0.003	0.99077
trmE	1947.64	1952.84	-0.004	0.94101
nqrE	2933.68	2941.52	-0.004	0.98771
recF	1323.11	1327.04	-0.004	0.98557
sbcB	1513.8	1518.76	-0.005	0.97605
recQ	1153.62	1157.67	-0.005	0.92368
cutC	147.811	148.472	-0.006	0.91196
gmhA	4303.18	4324.06	-0.007	0.97268
agaS	114.398	115.031	-0.008	0.94339
lspA	565.972	569.302	-0.008	1
HAPS_1831	29.938	30.12	-0.009	0.99297
carB	1583.57	1593.28	-0.009	0.84974
frdA	24697.1	24854	-0.009	0.96127
mnmA	2628.87	2648.09	-0.011	0.90218
ispH	501.681	505.446	-0.011	0.84462
plpD	20916.9	21075.1	-0.011	0.91878
lysS	3485.95	3512.97	-0.011	0.8943
rarA	1077.7	1086.16	-0.011	0.82793
HAPS_0441	450.687	454.347	-0.012	0.82012
rpsS	1353.31	1364.89	-0.012	0.99263
rluD	1341.65	1353.21	-0.012	0.91837
tig	8671.26	8753.35	-0.014	0.98494
HAPS_1075	1107.13	1117.65	-0.014	0.82071
cydB	6668.83	6734.11	-0.014	0.89484
licA	39.615	40.008	-0.014	0.9271
rlmL	1536.47	1552.7	-0.015	0.78199
fucR	51.695	52.261	-0.016	0.98356
recG	3112.9	3148.35	-0.016	0.83363
rplT	2598.23	2632.49	-0.019	0.75211
ispG	2549.09	2583.49	-0.019	0.82358
tatD	741.064	751.126	-0.019	0.83393
dedA	1024.88	1039.8	-0.021	0.73105
HAPS_0173	398.801	404.693	-0.021	0.76133
HAPS_2172	703.484	714.04	-0.021	0.84777
trpS	1118.33	1135.21	-0.022	0.82591
ubiC	156.096	158.479	-0.022	0.90185
thiP	649.072	659.186	-0.022	0.79836
coaA	442.461	449.55	-0.023	0.97521
HAPS_1909	48.128	48.927	-0.024	0.93759
sapB	381.568	387.947	-0.024	0.92327
HAPS_1299	973.347	989.64	-0.024	0.77497
plpA	1579.72	1606.19	-0.024	0.92791
valS	3085.27	3136.97	-0.024	0.73513
frdB	6652.1	6766.96	-0.025	0.85851
accD	2493.08	2536.51	-0.025	0.79089
clpX	2793.82	2842.7	-0.025	0.81207
murB	566.762	576.728	-0.025	0.78079
pntB	8051.21	8193.08	-0.025	0.71623
trmD	6146.25	6254.77	-0.025	0.75597
amiB	789.077	803.354	-0.026	0.98352
wza	8600.21	8756.15	-0.026	0.79045
tbpA	1331.64	1355.83	-0.026	0.87314
ribA	648.613	660.724	-0.027	0.76631
ccmH_2	709.871	723.453	-0.027	0.74506
adk	2761.18	2814.45	-0.028	0.74129
HAPS_0104	323.302	329.565	-0.028	0.96735
leuC	601.156	612.944	-0.028	0.71412
HAPS_1835	160.437	163.674	-0.029	0.82435
hpt	2201.93	2246.78	-0.029	0.79865
nanH	487.53	497.481	-0.029	0.852
pntA	10023	10229.3	-0.029	0.68052
HAPS_0841	574.115	586.012	-0.03	0.75095
nqrB	10640.5	10864.7	-0.03	0.87174
aroB	994.894	1015.86	-0.03	0.69992
fadR	957.245	978.271	-0.031	0.75955
yeaD	1676.93	1715.62	-0.033	0.6961
dapD	1452.74	1486.48	-0.033	0.68827
ogt	255.183	261.231	-0.034	0.89143
nqrA	12674	12982.4	-0.035	0.6985
hrpA	2377.18	2435.62	-0.035	0.65919
pgi	2579.06	2642.53	-0.035	0.68972
HAPS_1406	254.417	260.752	-0.035	0.87017
galM	338.859	347.326	-0.036	0.82218
cydC	465.743	477.453	-0.036	0.75885
hemX	3808.7	3906.41	-0.037	0.9519
pheT	5144.88	5278.73	-0.037	0.74157
iscA	294.234	301.941	-0.037	0.78321
lppC	2883.82	2960.47	-0.038	0.69864
cydD	640.394	657.514	-0.038	0.80194
iolE	235.423	241.855	-0.039	0.9117
hscB	905.164	930.791	-0.04	0.77126
secF	1373.7	1412.79	-0.04	0.65335
nusG	6596.87	6785.69	-0.041	0.60812
rbn	475.021	488.984	-0.042	0.68328
HAPS_1050	243.337	250.513	-0.042	0.80185
tuf	389.488	401.43	-0.044	0.7119
ruvA	1542.44	1591.16	-0.045	0.63664
HAPS_0103	111.313	114.835	-0.045	0.88364
ccmH	55.586	57.355	-0.045	0.86686
nagA	1572.44	1622.91	-0.046	0.6278
rhtB	385.884	398.455	-0.046	0.6533
ftsQ	793.345	819.259	-0.046	0.70543
pqiB	1103.1	1139.28	-0.047	0.6153
espP	6629.58	6847.31	-0.047	0.78925
bcp	824.687	851.775	-0.047	0.7655
priB	1077.34	1112.8	-0.047	0.69287
hisC	1757.67	1815.56	-0.047	0.56077
lonH	1244.39	1285.78	-0.047	0.63872
cvpA	554.452	573.147	-0.048	0.61819
ubiD	710.01	733.953	-0.048	0.60569
nadR	2070.84	2140.79	-0.048	0.77203
ubiB	3048.45	3152.61	-0.048	0.59277
alaS	10207.7	10561.5	-0.049	0.70747
HAPS_0174	886.612	917.761	-0.05	0.67851
slt	1470.62	1522.78	-0.05	0.62156
ispD	462.462	479.124	-0.051	0.62213
prtC	872.939	905.291	-0.052	0.60641
purE	108.167	112.303	-0.054	0.82453
pnuC	7898.05	8200.84	-0.054	0.52187
manX	3404.11	3536.79	-0.055	0.4996
oapB	234.042	243.176	-0.055	0.78543
HAPS_0514	128.014	133.035	-0.056	0.82295
purF	1221.36	1269.51	-0.056	0.5638
HAPS_0802	2070.06	2152.26	-0.056	0.56992
purA	2019.95	2100.4	-0.056	0.50611
rplD	5746.21	5975.5	-0.056	0.82418
miaA	708.261	736.77	-0.057	0.55721
rpsK	5395.11	5612.8	-0.057	0.53196
HAPS_0489	2662.34	2770.14	-0.057	0.47943
cca	599.146	623.603	-0.058	0.53008
HAPS_1359	54.807	57.047	-0.058	0.84105
norM	552.684	575.337	-0.058	0.54429
plsX	499.417	519.972	-0.058	0.61846
rpmJ	223.654	232.861	-0.058	0.77016
hsdS	108.22	112.751	-0.059	0.75296
HAPS_0331	193.835	201.989	-0.059	0.64188
tatB	2510.94	2618.49	-0.061	0.56923
icc	2209.13	2304	-0.061	0.5462
gnd	2189.3	2283.63	-0.061	0.46337
modB	701.204	731.508	-0.061	0.71689
ccmC	257.191	268.47	-0.062	0.7117
oapA	1685.24	1759.92	-0.063	0.8499
thiE	86.226	90.053	-0.063	0.74646
fucA	137.675	143.799	-0.063	0.67781
lppB	834.552	871.735	-0.063	0.50408
ddl	1383.31	1446.3	-0.064	0.52705
pqiA	486.72	508.945	-0.064	0.52707
menC	366.821	383.596	-0.065	0.68027
birA	925.669	968.091	-0.065	0.56109
rpsE	6534.69	6834.31	-0.065	0.63041
ribH	352.193	368.546	-0.065	0.65216
tatC	1302.86	1365.65	-0.068	0.49464
HAPS_0713	656.195	687.97	-0.068	0.5769
rpsF	11375.1	11930.3	-0.069	0.40627
selB	1533.93	1609.18	-0.069	0.44841
uvrB	1247.95	1309.17	-0.069	0.43965
accC	2971.78	3118.03	-0.069	0.4064
HAPS_2280	335.804	352.402	-0.07	0.6253
slyX	3.911	4.106	-0.07	1
HAPS_0105	77.013	80.925	-0.071	0.6885
HAPS_1521	10.075	10.588	-0.072	0.92785
argG	6697.19	7038.39	-0.072	0.37823
fabZ	322.699	339.161	-0.072	0.71901
tyrA	743.41	781.734	-0.073	0.48551
dacB	833.444	876.532	-0.073	0.52619
pepB	1035.01	1088.86	-0.073	0.48627
rplA	12811.2	13479.2	-0.073	0.37162
HAPS_0052	1219.19	1282.8	-0.073	0.45008
aphA	1859.79	1957.25	-0.074	0.42788
lnt	662.14	696.984	-0.074	0.51423
moaE	312.143	328.905	-0.075	0.54563
trxA	3155.49	3325.53	-0.076	0.38694
usg	1900.98	2003.41	-0.076	0.46279
HAPS_1757	299.718	316.021	-0.076	0.56911
tbpB	192.739	203.256	-0.077	0.82437
hslR	228.255	240.752	-0.077	0.62686
smpB	1529.94	1613.91	-0.077	0.44263
HAPS_1348	990.294	1044.76	-0.077	0.48757
HAPS_2240	504.875	532.669	-0.077	0.41686
HAPS_0688	339.973	358.969	-0.078	0.64673
HAPS_0690	2689.98	2841.22	-0.079	0.41518
HAPS_0727	4790.45	5062.94	-0.08	0.37418
fabB	5935.44	6277.02	-0.081	0.33835
HAPS_0277	1324.07	1400.35	-0.081	0.53934
HAPS_2068	368.665	389.914	-0.081	0.55505
pgpB	433.414	458.688	-0.082	0.50792
ppiB	703.774	744.916	-0.082	0.65824
rfaF	1262.04	1336.81	-0.083	0.43413
atpB	3078.8	3262.43	-0.084	0.31155
HAPS_2042	161.168	170.819	-0.084	0.5574
arcA	4716.47	4999.03	-0.084	0.35677
mltA	768.973	815.088	-0.084	0.46529
corC	980.037	1039.8	-0.085	0.34137
HAPS_1085	295.585	313.631	-0.085	0.72084
HAPS_2171	753.39	799.441	-0.086	0.37757
gidA	1377.86	1462.66	-0.086	0.31808
HAPS_0280	788.399	836.937	-0.086	0.4053
abiQ	379.078	402.616	-0.087	0.768
folB	418.17	444.169	-0.087	0.4588
ddc	84.501	89.762	-0.087	0.75307
lpdA	9976.65	10599.9	-0.087	0.31479
mutL	1820.31	1934.3	-0.088	0.49865
HAPS_1899	363.335	386.087	-0.088	0.39483
nrdA	8403.75	8930.76	-0.088	0.28948
glnD	906.5	963.434	-0.088	0.30794
rplC	7481.18	7951.72	-0.088	0.65263
moaD	104.604	111.213	-0.088	0.78319
atpH	3098.95	3295.56	-0.089	0.29895
crp	2306.01	2452.39	-0.089	0.31482
ccmA	29.553	31.431	-0.089	0.88007
wecA	674.761	717.667	-0.089	0.44545
prlC	2064.44	2195.8	-0.089	0.30307
dgt	1460.76	1554.19	-0.089	0.30899
HAPS_1718	379.728	404.203	-0.09	0.452
HAPS_0915	3.581	3.812	-0.09	0.95575
htpX	3267.68	3479.28	-0.091	0.31945
slmA	279.49	297.722	-0.091	0.54362
HAPS_0289	100.433	106.991	-0.091	0.65066
mazG	926.068	986.588	-0.091	0.37545
HAPS_1307	608.277	648.219	-0.092	0.38899
malT	1166.47	1243.1	-0.092	0.45887
HAPS_0852	1276.83	1360.98	-0.092	0.3171
genX	931.16	992.788	-0.092	0.38715
uspA	1541.24	1643.43	-0.093	0.27986
topB	801.92	855.191	-0.093	0.35166
mip	335.421	357.898	-0.094	0.48965
ppiD	1675.7	1788.06	-0.094	0.61936
nlpI	1899.21	2027.25	-0.094	0.28636
cstA	1651.67	1763.06	-0.094	0.33169
HAPS_1729	387.38	413.575	-0.094	0.41845
HAPS_0585	52.066	55.594	-0.095	0.73734
pyrG	2582.36	2758.72	-0.095	0.29577
pyrF	1391.16	1486.93	-0.096	0.26917
wecF	555.883	594.402	-0.097	0.37895
fusA	21354.1	22838.2	-0.097	0.36261
ordL	687.965	736.47	-0.098	0.48473
chaA	1612.86	1726.86	-0.099	0.27138
neuA	1099.08	1176.96	-0.099	0.32632
murG	799	856.002	-0.099	0.30106
nanA	2211.79	2370.53	-0.1	0.37748
mutM	229.393	245.859	-0.1	0.53827
selA	1059.59	1136.1	-0.101	0.29524
HAPS_1695	3730.62	4002.21	-0.101	0.21047
pbpB	1114.89	1196.56	-0.102	0.28967
yjdF	517.891	556.335	-0.103	0.32191
nagB	1136.07	1220.75	-0.104	0.28515
HAPS_1751	675.951	726.41	-0.104	0.44656
HAPS_1541	150.019	161.279	-0.104	0.49541
secB	3986.48	4286.97	-0.105	0.3405
proP	319.38	343.568	-0.105	0.36255
tehB	1123.25	1208.94	-0.106	0.63587
metE	790.102	850.389	-0.106	0.27121
HAPS_1092	2046.98	2203.84	-0.107	0.27256
rfaD	3363.57	3622.15	-0.107	0.1913
HAPS_1806	367.504	395.905	-0.107	0.36833
acrR	1867.1	2011.61	-0.108	0.24623
proA	419.375	451.987	-0.108	0.36369
queC	83.285	89.827	-0.109	0.61146
gloB	254.822	274.946	-0.11	0.41048
sstT	494.386	533.491	-0.11	0.32328
HAPS_1384	2288.23	2469.37	-0.11	0.22142
gcp	758.263	818.45	-0.11	0.34407
ompP5	52202	56397.8	-0.112	0.16278
copA	12.063	13.038	-0.112	0.92158
glyA	3404.76	3680.45	-0.112	0.18098
iolD	34.704	37.516	-0.112	0.73718
secA	4107.45	4440.99	-0.113	0.17498
HAPS_1837	1075.54	1162.89	-0.113	0.23202
thrC	2672.18	2891.48	-0.114	0.20131
fabA	3923.74	4246.38	-0.114	0.1874
typA	4558.44	4937.28	-0.115	0.18272
rplJ	19955.3	21624.3	-0.116	0.14694
thrS	4023.68	4363.92	-0.117	0.17149
rimI	449.594	487.835	-0.118	0.34895
rsuA	316.498	343.448	-0.118	0.4787
thrB	668.999	726.171	-0.118	0.26424
rsaL	190.358	206.646	-0.118	0.37825
qseC	1610.23	1748.96	-0.119	0.20733
yigP	748.413	813.061	-0.12	0.26439
tolR	337.937	367.166	-0.12	0.35248
radA	503.524	547.533	-0.121	0.23977
HAPS_1855	218.164	237.306	-0.121	0.40215
fabR	382.536	416.333	-0.122	0.32718
rluA	290.169	315.991	-0.123	0.40254
nfrE	1094.42	1192.97	-0.124	0.22164
thiQ	350.827	382.529	-0.125	0.37397
stbE	175.824	191.724	-0.125	0.68933
rec2	97.917	106.872	-0.126	0.57478
HAPS_0457	1003.64	1095.45	-0.126	0.1975
engA	2042.77	2229.75	-0.126	0.16302
ilvD	869.883	949.583	-0.126	0.17022
yaaH	1263.35	1379.69	-0.127	0.16948
manA	1711.56	1869.27	-0.127	0.17329
sapC	417.441	455.993	-0.127	0.28597
dxr	2891.57	3160.79	-0.128	0.13088
lpxA	1413.8	1545.94	-0.129	0.18491
mreD	206.737	226.08	-0.129	0.38775
hmuT	234.425	256.393	-0.129	0.36392
galE	2949.5	3226.27	-0.129	0.14895
cysB	1501.26	1642.26	-0.13	0.59026
glmS	4289.9	4693.51	-0.13	0.1324
rplB	14881.3	16284.5	-0.13	0.59061
HAPS_1656	576.555	631.544	-0.131	0.18871
prmC	836.251	916.304	-0.132	0.16784
rsmB	340.692	373.367	-0.132	0.2581
alr	706.671	774.651	-0.133	0.16634
comE	29.538	32.442	-0.135	0.8141
prtR	588.752	646.878	-0.136	0.65419
cysZ	476.654	523.949	-0.136	0.20573
pepP	993.401	1092.28	-0.137	0.1909
frr	4531.68	4983.16	-0.137	0.21548
queF	950.038	1044.74	-0.137	0.2653
mhpC	461.749	507.981	-0.138	0.235
HAPS_1565	693.734	763.627	-0.138	0.23163
ftsW	657.426	723.779	-0.139	0.20975
HAPS_1462	26.047	28.678	-0.139	0.69495
engD	1823.72	2008.01	-0.139	0.12467
rplI	6158.52	6781.71	-0.139	0.091178
HAPS_1363	1187.9	1309.21	-0.14	0.13861
gltS	1079.83	1190.43	-0.141	0.18306
thiM	77.166	85.111	-0.141	0.60997
holC	1869.21	2061.88	-0.142	0.10647
HAPS_1010	927.254	1022.88	-0.142	0.15677
moaC	404.585	446.569	-0.142	0.33624
HAPS_1825	590.92	652.262	-0.142	0.19319
hemB	598.179	660.807	-0.144	0.19279
rph	1014.29	1120.66	-0.144	0.11672
pilA	12.076	13.35	-0.145	0.86224
djlA	697.619	771.648	-0.146	0.18359
hisS	6222.61	6884.06	-0.146	0.075262
yciH	234.349	259.391	-0.146	0.29594
HAPS_0584	131.205	145.288	-0.147	0.34928
HAPS_0639	47.728	52.859	-0.147	0.57539
purR	2578.32	2856.26	-0.148	0.079392
atpF	1674.37	1854.88	-0.148	0.0962
thiD	76.656	84.939	-0.148	0.53755
mraY	1607.89	1783.59	-0.15	0.37853
cyaA	3558.62	3952.78	-0.152	0.077828
HAPS_0323	125.83	139.817	-0.152	0.34332
wecD	520.783	579.067	-0.153	0.14141
rlpB	645.827	718.363	-0.154	0.14646
menA	179.7	199.975	-0.154	0.32088
ispF	785.922	874.94	-0.155	0.10578
ubiH	1290.7	1437.17	-0.155	0.12081
HAPS_2202	296.063	329.734	-0.155	0.29396
pheS	1874.08	2087.31	-0.155	0.072928
rnfE	236.694	263.693	-0.156	0.2334
wecE	781.541	870.865	-0.156	0.13659
tpx	954.927	1064.13	-0.156	0.10509
bioC	409.187	456.079	-0.157	0.266
orfG	1091.35	1217.17	-0.157	0.1149
HAPS_0364	141.589	157.993	-0.158	0.40012
purB	2323.4	2592.59	-0.158	0.066508
thiI	829.02	925.518	-0.159	0.10318
tsf	10771.1	12028.3	-0.159	0.048996
fstE	427.122	477.234	-0.16	0.33055
glgP	10563.4	11805.5	-0.16	0.052501
gidB	683.571	764.007	-0.16	0.12778
thiL	854.032	954.623	-0.161	0.11187
rplK	16490	18434.9	-0.161	0.054584
thrA	7027.73	7856.89	-0.161	0.052055
pyrD	379.662	424.55	-0.161	0.411
HAPS_1072	233.667	261.523	-0.162	0.21589
secE	2652.59	2971.16	-0.164	0.061236
yfeB	576.572	645.842	-0.164	0.12478
gor	3415.25	3830.48	-0.166	0.04388
xseA	3950.05	4430.49	-0.166	0.042315
glmU	1409.61	1581.8	-0.166	0.068698
greA	1811.87	2033.24	-0.166	0.072159
gyrA	7964.39	8943.7	-0.167	0.043296
sspA	3853.24	4327.77	-0.168	0.085837
HAPS_0808	399.312	448.721	-0.168	0.1551
msrA	822.25	924.464	-0.169	0.61653
yjgF	745.115	838.136	-0.17	0.089165
mreC	901.043	1013.65	-0.17	0.08774
moaA	1159.52	1304.89	-0.17	0.062237
pspE	673.606	758.188	-0.171	0.10251
prmA	1368.49	1540.67	-0.171	0.071553
iscS	8658.6	9756.14	-0.172	0.043799
HAPS_0419	15.665	17.652	-0.172	0.81097
trmB	975.678	1099.58	-0.172	0.091746
trpC	505.824	570.059	-0.172	0.11875
pheA	1941.21	2188.83	-0.173	0.059587
metR	1763.54	1989.59	-0.174	0.061996
groEL	20132.9	22722	-0.175	0.033676
pmbA	1609.62	1817.69	-0.175	0.048745
HAPS_0322	19.87	22.44	-0.175	0.62308
higB	602.862	681.064	-0.176	0.088875
hemG	284.28	321.225	-0.176	0.39672
lpxL	1177.58	1330.95	-0.177	0.057923
pyrH	1119.18	1265.01	-0.177	0.057121
cspD	688.195	778.208	-0.177	0.098572
HAPS_2113	957.426	1083.35	-0.178	0.51982
rnt	1031.08	1167.02	-0.179	0.073646
argE	1136.7	1287.22	-0.179	0.061495
pth	963.528	1091.93	-0.18	0.05971
ftsY	784.761	889.422	-0.181	0.075273
HAPS_2115	900.41	1020.56	-0.181	0.4222
HAPS_2297	1575.97	1786.48	-0.181	0.041983
HAPS_0151	598.399	678.638	-0.182	0.085141
lpxK	140.695	159.578	-0.182	0.29322
fmt	655.294	743.627	-0.182	0.062448
iolC	167.405	190.023	-0.183	0.29445
metQ	380.015	431.376	-0.183	0.42089
mukE	1097.47	1245.98	-0.183	0.064614
dapB	693.042	787.42	-0.184	0.05725
dppF	320.665	364.342	-0.184	0.12184
menE	869.953	988.913	-0.185	0.12968
fbpA	12510.9	14225.5	-0.185	0.022844
lrp	644.35	732.829	-0.186	0.10337
HAPS_0842	10.739	12.214	-0.186	0.86281
seqA	1118.13	1272.4	-0.186	0.054509
rfaE	781.747	890.13	-0.187	0.077589
purU	602.658	686.287	-0.187	0.26133
yfbB	171.846	195.715	-0.188	0.26153
def	1677.66	1910.84	-0.188	0.030985
HAPS_0026	2022.98	2304.23	-0.188	0.032277
purL	745.79	849.754	-0.188	0.07057
pilT	298.367	340.031	-0.189	0.16765
comM	145.52	165.86	-0.189	0.52296
ftsI	3922.85	4471.62	-0.189	0.025038
HAPS_0395	566.399	645.644	-0.189	0.088676
lolC	94.489	107.745	-0.189	0.39885
trpG	228.18	260.309	-0.19	0.1787
pepT	1606.97	1833.24	-0.19	0.031624
panF	10076	11500.9	-0.191	0.09604
sucD	281.93	322.136	-0.192	0.33452
HAPS_0200	1113.91	1273.63	-0.193	0.049107
parC	4865.47	5569.89	-0.195	0.017171
pgsA	1100.18	1260.08	-0.196	0.037582
manY	1350.81	1548.39	-0.197	0.029247
HAPS_2190	461.409	528.947	-0.197	0.086085
ligA	685.181	785.802	-0.198	0.09112
rpmE	4176.75	4791.81	-0.198	0.015418
rep	1258.8	1444.46	-0.198	0.026228
orfM	707.032	811.564	-0.199	0.059117
ntpA	248.885	285.775	-0.199	0.12843
yieE	377.627	433.655	-0.2	0.10959
ilvY	514.121	591.112	-0.201	0.067149
holB	944.702	1086.47	-0.202	0.036693
HAPS_2110	145.913	167.979	-0.203	0.1956
rpsJ	11428.8	13164.7	-0.204	0.13702
dusC	209.897	242.021	-0.205	0.1566
nusB	683.8	789.061	-0.207	0.058004
rnhB	88.003	101.561	-0.207	0.30189
mglC	697.89	806.001	-0.208	0.047939
HAPS_1427	26.68	30.85	-0.209	0.52869
HAPS_0276	2535.56	2932.93	-0.21	0.027293
acrA	4271.71	4942.1	-0.21	0.012325
mutT	116.398	134.673	-0.21	0.2145
HAPS_0515	96.104	111.238	-0.211	0.45972
rbfA	69.833	80.841	-0.211	0.4039
HAPS_0794	170.041	196.899	-0.212	0.17423
nhaC	70.41	81.538	-0.212	0.42114
higA	1073.79	1244.5	-0.213	0.02505
hns	2971.03	3447.01	-0.214	0.43229
hemE	2478.77	2880.49	-0.217	0.012807
HAPS_1648	590.323	686.167	-0.217	0.041485
murC	2311.86	2687.48	-0.217	0.012297
HAPS_0910	0.968	1.125	-0.217	1
secD	4287.59	4984.77	-0.217	0.012133
rplS	0.968	1.126	-0.218	1
manZ	2818.69	3281.54	-0.219	0.0095593
fdx	582.376	678.04	-0.219	0.047885
serA	1219.08	1419.61	-0.22	0.018782
HAPS_0824	50.998	59.465	-0.222	0.47413
dgkA	1132.62	1321.42	-0.222	0.020414
sgbU	2379.69	2779.21	-0.224	0.011212
cybC	334.075	390.323	-0.224	0.3218
uppS	27.595	32.249	-0.225	0.56666
hicA	26.006	30.397	-0.225	0.58941
HAPS_1720	35.445	41.432	-0.225	0.45347
mnmC	927.529	1085.09	-0.226	0.080448
folA	588.751	689.325	-0.228	0.031032
HAPS_1803	61.814	72.402	-0.228	0.28398
HAPS_0469	356.541	418.047	-0.23	0.0673
yajC	2006.01	2353.07	-0.23	0.0087861
grxA	474.303	556.85	-0.231	0.040551
rumA	1709.47	2008.89	-0.233	0.0091206
ccmE	908.503	1067.93	-0.233	0.01752
HAPS_0590	14.24	16.77	-0.236	0.61238
uvrA	3964.6	4670.16	-0.236	0.033322
dnaJ	968.391	1140.76	-0.236	0.01356
groES	1593.58	1877.88	-0.237	0.0081366
lexA	1553.62	1832.4	-0.238	0.0089087
waaQ	487.943	575.558	-0.238	0.04516
metJ	1487.48	1755.35	-0.239	0.0084419
mutS	4851.24	5732.13	-0.241	0.0037054
potD	14572.6	17219.6	-0.241	0.0038301
ptsB	15605.6	18440.8	-0.241	0.0028808
hflC	2372.69	2804.44	-0.241	0.0064096
tyrP	1522.14	1799.82	-0.242	0.00903
ftsB	376.343	445.153	-0.242	0.055268
HAPS_1811	103.271	122.415	-0.245	0.18064
HAPS_2296	262.836	311.615	-0.246	0.063659
dctM	203.179	240.924	-0.246	0.081968
HAPS_0953	3.894	4.628	-0.249	0.85304
cpxR	942.054	1120.74	-0.251	0.012244
psiE	76.729	91.414	-0.253	0.26812
metB	1077.98	1285.25	-0.254	0.0062501
afuB	1906.79	2274.15	-0.254	0.0039154
selD	2429.55	2899.72	-0.255	0.0026004
dppC	491.32	587.68	-0.258	0.063307
sfcA	4370.1	5229.32	-0.259	0.0016871
pirA	40.913	49.071	-0.262	0.30973
HAPS_1776	28.595	34.322	-0.263	0.45016
aceF	9359.81	11238.8	-0.264	0.0014754
frxA	358.681	430.979	-0.265	0.025652
aceE	15082.8	18125.1	-0.265	0.0014498
HAPS_1030	703.163	845.413	-0.266	0.010218
lipA	1317.67	1584.83	-0.266	0.0034948
agaR	753.445	906.843	-0.267	0.0079426
lpxH	449.123	540.996	-0.269	0.021878
oxyR	1213.07	1465.41	-0.273	0.0088591
dfp	64.101	77.51	-0.274	0.21752
rpsB	18430.5	22302.6	-0.275	0.00083167
aroQ	485.415	588.004	-0.277	0.014039
HAPS_2059	647.86	787.267	-0.281	0.034627
znuB	210.515	256.41	-0.285	0.097348
lolD	693.414	847.649	-0.29	0.0042664
opsX	255.589	312.942	-0.292	0.035723
dppD	813.661	998.836	-0.296	0.13847
gmk	829.184	1018.34	-0.296	0.0029642
rdgC	1823.91	2243.13	-0.298	0.00089954
vanY	238.422	293.415	-0.299	0.022694
fabH	2178.37	2682.34	-0.3	0.00064161
mraZ	1136.29	1401.6	-0.303	0.00097931
HAPS_0637	224.334	276.838	-0.303	0.0243
ulaD	932.331	1150.67	-0.304	0.0026426
rplY	3877.2	4785.62	-0.304	0.00039276
trpE	101.069	124.843	-0.305	0.11594
HAPS_0296	265.816	329.005	-0.308	0.042733
bioA	540.002	668.822	-0.309	0.0036407
rhlB	2386.87	2956.47	-0.309	0.0067861
HAPS_1944	69.846	86.541	-0.309	0.15724
chpA	261.243	324.324	-0.312	0.018737
murE	2911.81	3621.82	-0.315	0.00018075
HAPS_1505	800.717	996.463	-0.316	0.0015265
rpe	1357.77	1691.62	-0.317	0.00048281
HAPS_0524	545.235	679.678	-0.318	0.0028854
sucC	293.814	366.446	-0.319	0.12117
fstN	890.366	1110.65	-0.319	0.18523
recA	2855.35	3562.22	-0.319	0.0011998
mogA	314.836	392.882	-0.319	0.0126
dapF	631.545	789.035	-0.321	0.0019623
alfA	49.603	62.028	-0.322	0.33995
ung	700.887	876.97	-0.323	0.0020484
rsmC	287.6	359.995	-0.324	0.011328
HAPS_1618	914.157	1144.46	-0.324	0.00064311
ilvG	384.738	482.022	-0.325	0.02131
HAPS_0506	15.257	19.118	-0.325	0.49337
HAPS_1187	45.966	57.621	-0.326	0.24766
menD	2747.55	3445.85	-0.327	0.00017413
xseB	24.023	30.177	-0.329	0.45299
fdxG_2	6551.65	8232.2	-0.329	5.83e-05
ftsL	33.145	41.649	-0.329	0.25768
HAPS_0752	139.28	175.017	-0.33	0.046828
HAPS_0583	1.959	2.463	-0.33	0.96646
phnE	226.75	285.405	-0.332	0.021227
kefBC	185.569	233.576	-0.332	0.086122
metX	519.062	653.846	-0.333	0.0090872
HAPS_2056	67.93	85.713	-0.335	0.13065
aroF	295.955	373.447	-0.336	0.0081315
prfB	320.248	404.258	-0.336	0.0072275
asnA	246.414	311.07	-0.336	0.069211
comF	23.405	29.575	-0.338	0.42032
galK	325.681	411.688	-0.338	0.0086639
mobAB	376.994	476.561	-0.338	0.01781
ilvH	240.575	304.343	-0.339	0.012495
ilvM	73.319	92.798	-0.34	0.11591
HAPS_1472	625.181	791.53	-0.34	0.00078997
ssb	3231.13	4095.28	-0.342	8.23e-05
fbpB	657.591	834.03	-0.343	0.0011042
mraW	1141.57	1448.11	-0.343	0.00029747
napH	2256.14	2866.33	-0.345	5.72e-05
HAPS_1953	19.579	24.876	-0.345	0.3936
mutH	494.448	628.499	-0.346	0.0013521
sspB	692.742	880.863	-0.347	0.00078664
bioF	461.693	587.106	-0.347	0.0013624
atpE	1030.09	1313.12	-0.35	0.00023094
HAPS_1487	470.628	600.888	-0.353	0.0012397
HAPS_1829	0.968	1.237	-0.354	0.97487
guaA	1378.61	1762.47	-0.354	0.01308
nhaA	226.93	290.212	-0.355	0.007983
cdsA	164.869	211.51	-0.359	0.018896
cheY	789.026	1014.06	-0.362	0.00038242
yfiF	689.209	886.714	-0.364	0.00035948
kdsC	560.474	722.184	-0.366	0.00081013
HAPS_0404	11.979	15.501	-0.372	0.55864
aroG	5104.19	6605.28	-0.372	2.54e-05
murF	2268.93	2938.55	-0.373	1.64e-05
wecB	232.074	301.786	-0.379	0.0061713
HAPS_2019	817.941	1064.35	-0.38	0.0001818
nanE	656.302	856.56	-0.384	0.0002044
rrmJ	1565.81	2043.86	-0.384	3.23e-05
metI	326.352	426.342	-0.386	0.0013155
rraA	2956.55	3872.45	-0.389	4.27e-06
HAPS_0227	469.623	615.395	-0.39	0.000352
igtF	1227.64	1610.75	-0.392	2.03e-05
HAPS_1902	357.765	469.877	-0.393	0.00071147
plsY	260.296	341.972	-0.394	0.0036667
pdxY	3646.67	4791.06	-0.394	2.46e-06
ispZ	213.149	280.196	-0.395	0.0041932
rbsD	163.438	214.9	-0.395	0.1352
ompP1	956.942	1259	-0.396	5.68e-05
napF	1147.47	1510	-0.396	8.94e-05
HAPS_1101	975.763	1284.56	-0.397	5.92e-05
gntR	552.17	728.073	-0.399	0.00025307
orn	468.003	618.658	-0.403	0.00040506
metN	532.068	703.548	-0.403	0.00016054
HAPS_2076	966.731	1279.39	-0.404	0.052631
relA	6334.04	8384.65	-0.405	9.82e-07
map	3229.17	4280.97	-0.407	0.0017919
thyA	1344.66	1784.73	-0.408	6.64e-06
rnb	1832.11	2431.79	-0.409	6.21e-06
HAPS_1738	58.19	77.412	-0.412	0.25399
dnaQ	757.928	1008.67	-0.412	4.68e-05
dppB	1448.71	1931.31	-0.415	0.0047295
HAPS_1682	129.974	173.655	-0.418	0.013023
phnC	187.063	249.976	-0.418	0.0036683
udp	2471.02	3307.16	-0.42	1.07e-06
lon	5130.27	6894.14	-0.426	0.006883
gltD	771.841	1039.38	-0.429	0.021225
HAPS_1649	118.564	160.044	-0.433	0.010385
ndpA	570.71	772.3	-0.436	3.51e-05
HAPS_0531	63.95	86.541	-0.436	0.46731
gpt	2098.67	2844.79	-0.439	7.52e-07
purH	743.015	1008.06	-0.44	1.42e-05
HAPS_2219	632.948	859.002	-0.441	1.84e-05
gltB	3502.14	4760.18	-0.443	0.085371
HAPS_0591	32.126	43.694	-0.444	0.14285
apbE	2104.71	2863.91	-0.444	0.00064273
purC	206.412	281.583	-0.448	0.0015288
ygiW	7193.93	9843.84	-0.452	5.35e-08
HAPS_1641	0.974	1.336	-0.456	0.97491
HAPS_0836	876.389	1206.74	-0.461	1.91e-06
HAPS_1352	13.65	18.8	-0.462	0.36699
znuC	271.381	373.968	-0.463	0.00032681
apoB	10.065	13.871	-0.463	0.43214
HAPS_1156	219.605	304.155	-0.47	0.001801
rmuC	1214.18	1687.93	-0.475	8.57e-05
HAPS_0471	270.808	376.892	-0.477	0.00021627
comA	9.438	13.137	-0.477	0.46503
sucB	914.34	1273.99	-0.479	8.12e-07
sppA	998.441	1391.57	-0.479	4.27e-07
HAPS_1457	2146.3	2991.55	-0.479	4.12e-08
HAPS_1276	119.371	166.816	-0.483	0.0060161
gcvA	2369.65	3320.74	-0.487	0.00042382
rpiA	642.511	902.25	-0.49	1.43e-06
napC	2380.64	3347.63	-0.492	1.25e-08
ilvE	1225.77	1727.47	-0.495	6.48e-08
HAPS_0295	677.375	956.385	-0.498	0.00034444
HAPS_1104	85.356	120.627	-0.499	0.036592
nfo	72.861	103.068	-0.5	0.016947
yidK	291.846	413.218	-0.502	4.75e-05
hindIIIM	14.907	21.181	-0.507	0.24426
HAPS_0991	11.996	17.054	-0.508	0.34636
cdtB	1.949	2.772	-0.508	0.82935
uvrD	1787.87	2553.58	-0.514	7.16e-09
HAPS_0039	4172.57	5963.73	-0.515	9.17e-10
sodA	5467.53	7831.04	-0.518	3.97e-10
mdtH	457.26	655.178	-0.519	2.52e-06
HAPS_1357	472.241	676.658	-0.519	2.77e-05
plsC	73.249	105.236	-0.523	0.012434
HAPS_1278	5534.44	7952.77	-0.523	3.84e-08
pgpA	110.056	158.203	-0.524	0.0049398
codA	375.356	542.429	-0.531	4.42e-05
chpS	126.964	183.619	-0.532	0.00098247
cysQ	1758.32	2548.49	-0.535	1.3e-09
impA	616.119	894.92	-0.539	2.48e-07
guaB	5507.28	8015.69	-0.541	6.19e-11
hicB	98.898	144.138	-0.543	0.0033064
dld	1134.9	1657.17	-0.546	7.84e-09
corA	402.733	588.935	-0.548	1.18e-06
metF	72.127	105.725	-0.552	0.0054715
ldhL	116.447	171.439	-0.558	0.00095424
ulaC	550.862	815.22	-0.566	0.000104
degS	573.901	851.333	-0.569	2.11e-07
HAPS_1122	443.262	658.998	-0.572	1.86e-07
tonB	608.617	906.985	-0.576	0.00060084
HAPS_0407	618.165	923.16	-0.579	4.37e-06
HAPS_0337	6.811	10.186	-0.581	0.37231
HAPS_1784	21.173	31.742	-0.584	0.12409
hlyX	1397.29	2100.74	-0.588	8.99e-11
HAPS_2133	1.299	1.954	-0.589	0.81311
hslU	1585.85	2404.05	-0.6	3.1e-05
modA	134.598	204.258	-0.602	0.00014252
HAPS_1076	1.962	2.982	-0.604	0.70675
rbsB	755.191	1150.48	-0.607	5.28e-08
phnD	1687.97	2575.02	-0.609	3.97e-12
glnA	11046.3	16909.6	-0.614	8.23e-14
clpB	2432.72	3724.5	-0.614	1.24e-10
napG	2405.3	3696.68	-0.62	3.95e-13
erpA	346.329	535.016	-0.627	5e-08
dinP	450.451	698.005	-0.632	7.08e-09
mglB	4326.3	6773.05	-0.647	0.0014261
fklB	244.33	383.624	-0.651	7.48e-07
HAPS_1302	45.793	71.967	-0.652	0.00792
nudE	54.001	85.164	-0.657	0.0054795
ccdA	102.427	162.258	-0.664	0.11298
napB	1300.54	2064.63	-0.667	2.6e-13
HAPS_0703	44.454	70.609	-0.668	0.0079048
pts	14.667	23.31	-0.668	0.14248
clpP	1218.82	1941.06	-0.671	2.08e-12
recN	3653.43	5844.3	-0.678	1.24e-15
dppA	7098.67	11474.2	-0.693	3.56e-11
zwf	2471.58	4001.2	-0.695	1.14e-15
napA	11917.5	19461.3	-0.708	5.57e-18
HAPS_2174	14.657	24.024	-0.713	0.11446
grpE	1434.26	2359.57	-0.718	2.53e-15
pepA	699.043	1150.21	-0.718	3.89e-13
idgA	319.254	525.971	-0.72	1.31e-09
fbp	757.843	1264.81	-0.739	6.97e-14
fabG	7376.32	12414.2	-0.751	3.24e-20
cpxA	284.269	480.191	-0.756	2.16e-07
sucA	1763.45	2989.59	-0.762	3.9e-18
leuB	213.093	361.948	-0.764	7.85e-08
mglA	1004.55	1708.57	-0.766	0.0016933
HAPS_1828	738.932	1274.53	-0.786	5.15e-09
iclR	218.929	377.976	-0.788	2.55e-09
htpG	1747.62	3017.87	-0.788	1.69e-07
hugZ	786.163	1363.17	-0.794	9.97e-16
exbD	214.306	372.135	-0.796	4.39e-09
HAPS_1077	7.147	12.412	-0.796	0.34992
hugX	449.071	780.052	-0.797	1.38e-13
HAPS_0352	437.786	773.591	-0.821	5.56e-14
HAPS_1486	529.656	937.096	-0.823	4.88e-15
ald	2402.3	4250.66	-0.823	8.98e-22
HAPS_0316	7.847	13.956	-0.831	0.18493
purM	452.078	805.381	-0.833	2.6e-12
rseB	190.569	340.059	-0.835	9.03e-08
HAPS_0408	431.777	770.899	-0.836	2.1e-14
dnaK	9749.8	17509	-0.845	0.00035935
ilvI	513.782	929.935	-0.856	4.51e-16
fxsA	127.803	234.582	-0.876	6.42e-08
HAPS_1774	13.404	24.677	-0.88	0.038753
hxuB	15.937	29.365	-0.882	0.061425
gntK	211.355	391.004	-0.888	1.04e-08
putA	517.447	957.839	-0.888	1.06e-17
HAPS_0394	3.577	6.697	-0.905	0.27189
hslV	709.973	1343.26	-0.92	1.26e-20
napD	208.894	399.354	-0.935	1.29e-08
hxuC	77.54	148.841	-0.941	0.0010712
ilvC	623.297	1206.05	-0.952	4.16e-05
HAPS_1489	5.183	10.169	-0.972	0.18073
HAPS_0680	349.974	686.841	-0.973	1.25e-17
exbB	375.172	745.874	-0.991	8.46e-13
hslO	958.493	1947.68	-1.023	1.45e-27
HAPS_1287	3.566	7.3	-1.034	0.22713
HAPS_0678	263.363	546.31	-1.053	1.84e-18
HAPS_0679	539.798	1122.25	-1.056	5.91e-25
gntP	170.831	362.653	-1.086	2.39e-15
metK	373.303	798.762	-1.097	1.93e-23
HAPS_1759	89.619	193.641	-1.112	1.55e-10
lctP	1132.06	2501.33	-1.144	9.63e-36
putP	1634.51	3618.23	-1.146	3.03e-38
purD	53.3	119.597	-1.166	5.16e-07
rpoE	1414.39	3174.63	-1.166	1.39e-38
ulaA	2371	5815.71	-1.295	5.73e-29
gltA	344.727	857.631	-1.315	1.04e-32
HAPS_1110	0.985	2.476	-1.33	0.41877
HAPS_1218	135.069	343.15	-1.345	1.22e-20
mlc	401.411	1042.17	-1.376	7.17e-38
HAPS_2286	1.299	3.7	-1.51	0.28682
HAPS_1990	0.323	0.928	-1.524	0.75025
acnB	549.755	1584.56	-1.527	8.16e-44
HAPS_2130	448.945	1323.17	-1.559	1.47e-51
icd	482.27	1620.53	-1.749	1.29e-23
HAPS_1311	0.323	1.236	-1.938	0.63851
HAPS_0314	0.323	1.237	-1.939	0.5669
HAPS_1736	0.965	3.995	-2.049	0.1885
HAPS_2214	0.321	1.435	-2.159	0.55198
HAPS_0710	0.323	1.857	-2.525	0.31457
htrA	1433.18	8303.87	-2.535	1.77e-176
luxS	0.977	833.345	-9.737	1.19e-282
